# Supplementary material for: In Situ Eutectic Formation in a Polymeric Matrix via Hot-Melt Reactive Extrusion and the Use of Partial Least Squares Regression Modeling for Reaction Yield Determination
Source: PubMed Central journal article supplement (PMC11372829; doi:10.1021/acs.molpharmaceut.4c00152), 2024-08-13
Supplement: mp4c00152_si_001.pdf [file mp4c00152_si_001.pdf]

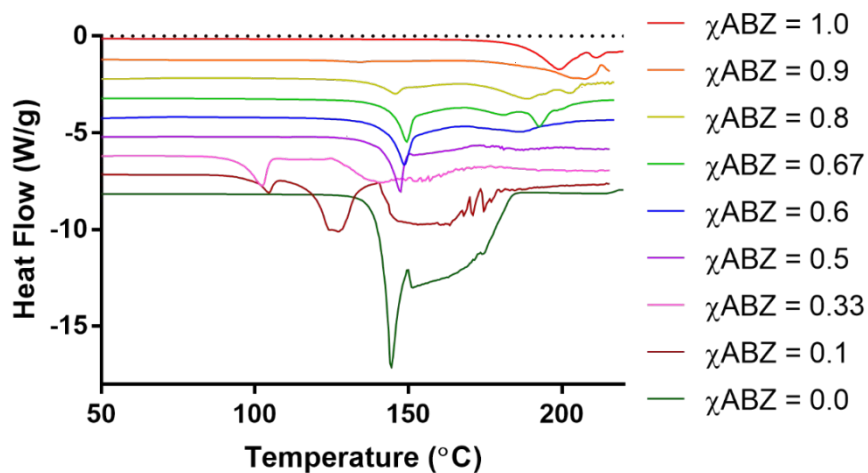

Supplementary Figure 1 Representative overlain DSC thermograms for binary mixtures of ABZ and MA after LAG at varying mole fractions of ABZ.

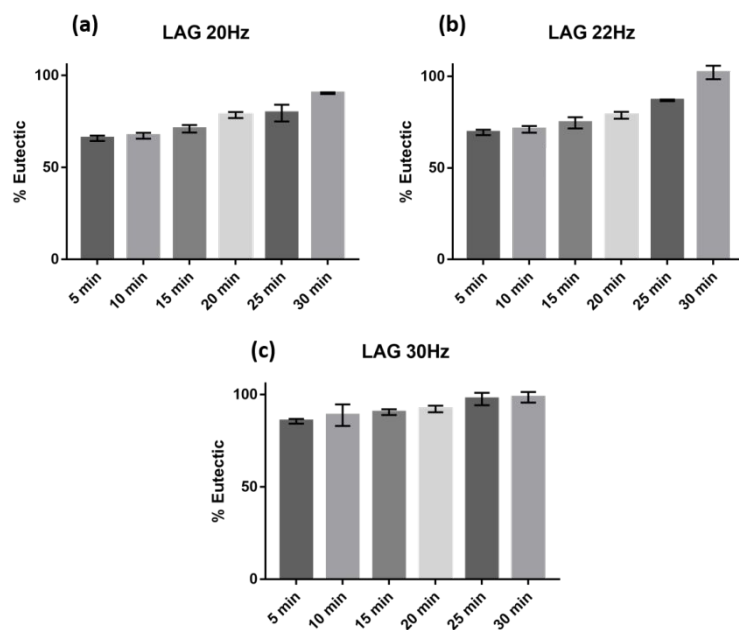

Supplementary Figure 2 Percentage yield of the 1:2 ABZ-MA eutectic during binary LAG, calculated using a PLS model after grinding for varying time periods at (a) 20 Hz, (b) 22 Hz and (c) 30 Hz, respectively.

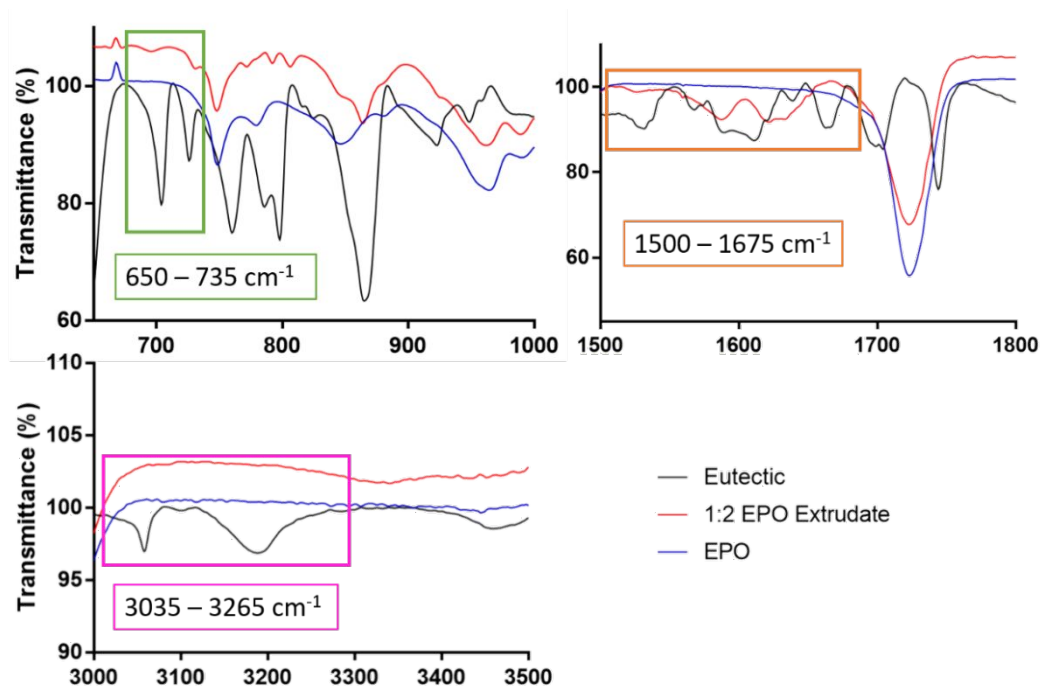

Supplementary Figure 3 FT-IR spectral regions, 3035 - 3265  $\text{cm}^{-1}$ , 1500 - 1675  $\text{cm}^{-1}$ , and 650 - 735  $\text{cm}^{-1}$ , where EPO was found to show negligible interference to the formation of the ABZ-MA 1:2 eutectic.

Supplementary Table 1 Calculated parameters from several versions of the PLS model when data were pre-processed using different spectral filters\*.

| Spectral Filter            | $R^2X$ | $R^2Y$ | $Q^2$ | RMSEE | RMSEcv |
|----------------------------|--------|--------|-------|-------|--------|
| Raw data                   | 0.963  | 0.944  | 0.934 | 8.62  | 9.20   |
| SNV                        | 0.945  | 0.976  | 0.974 | 5.70  | 5.85   |
| MSC                        | 0.950  | 0.974  | 0.972 | 5.89  | 6.05   |
| 1 <sup>st</sup> Derivative | 0.958  | 0.978  | 0.974 | 5.45  | 6.07   |
| 2 <sup>nd</sup> Derivative | 0.957  | 0.980  | 0.977 | 5.19  | 5.58   |
| Savitzky-Golay             | 0.963  | 0.946  | 0.935 | 8.53  | 9.15   |

\*  $R^2X$ ,  $R^2$  predicted;  $R^2Y$ ,  $R^2$  observed;  $Q^2$ , indication of model validity; RMSEE, root mean square error of estimation; RMSEcv, root mean square error of cross validation; SNV, standard normalised variate; MSC, multiplicative scatter correction.

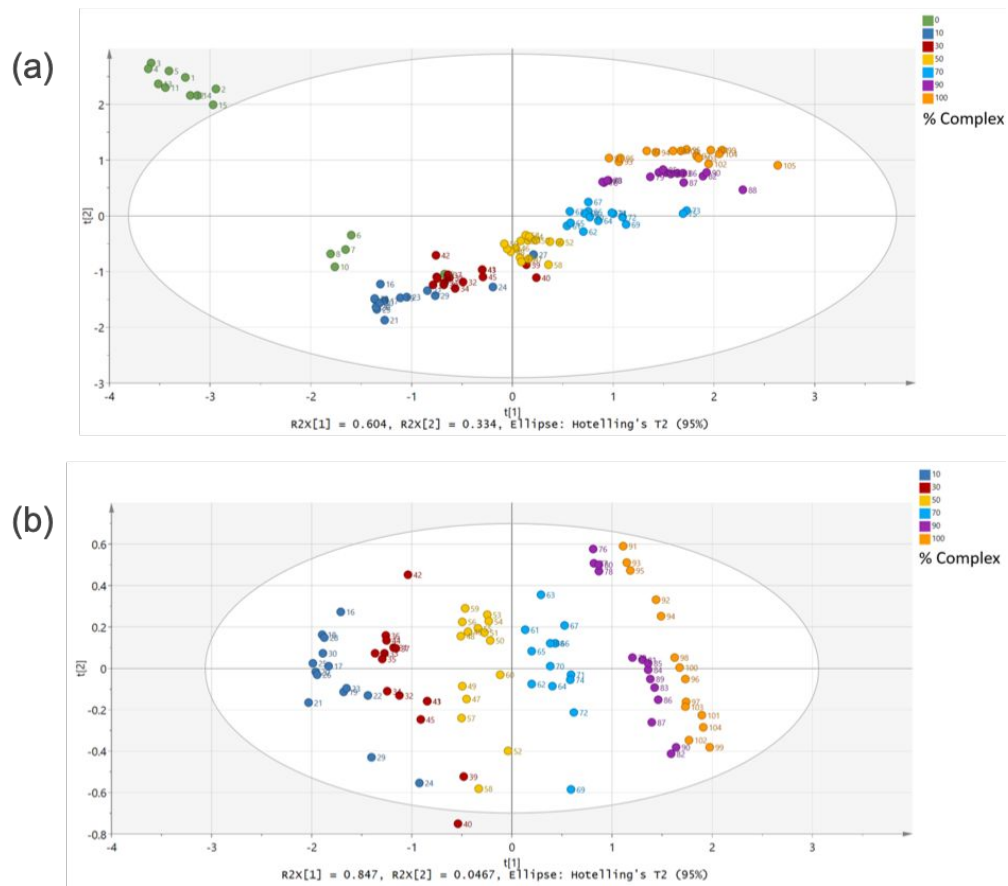

Supplementary Figure 4 Score plot of data after application of the first (a) and second (b) derivative filters, respectively, ( $t_1$  versus  $t_2$ ), containing two principal components. The plot was coloured according to percentage of the ABZ-MA 1:2 eutectic.

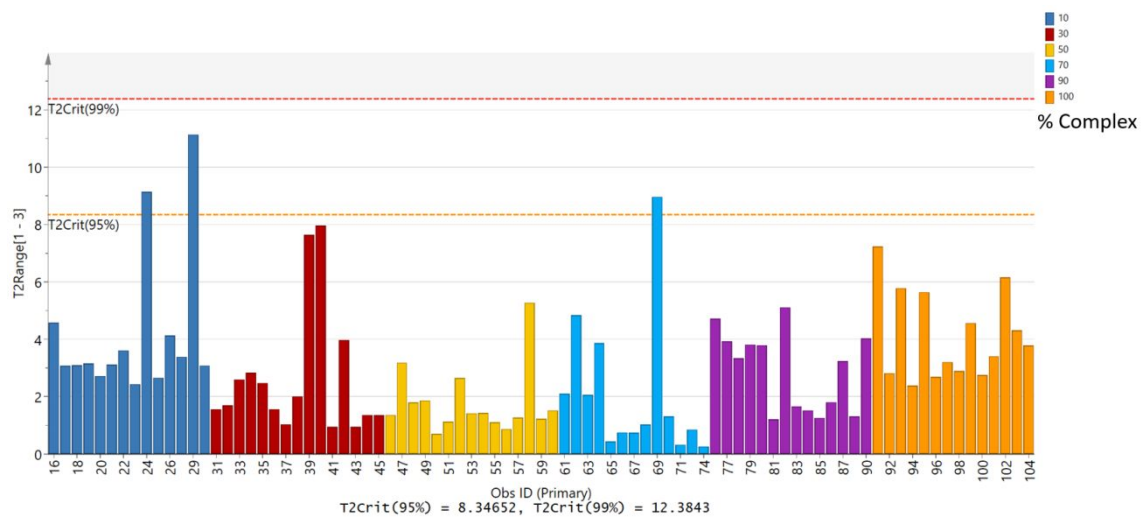

Supplementary Figure 5 Hotelling's T2 plot, showing three suspect outliers and no major outliers in the data after application of the second derivative filter. The 95% and 99% confidence limits are shown by the yellow and red dotted lines, respectively. The column plot was coloured according to percentage of the ABZ-MA 1:2 eutectic.

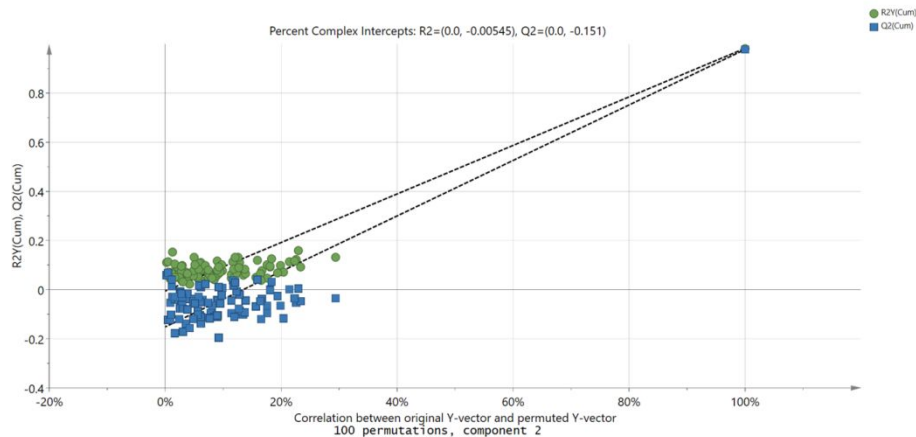

Supplementary Figure 6 Response permutation plot for validation of the model, where the green circles represent  $R^2Y$  and the blue squares  $Q^2$ .  $Q^2$  intercepted at  $-0.151$  and  $R^2$  intercepted at  $-0.005$ .

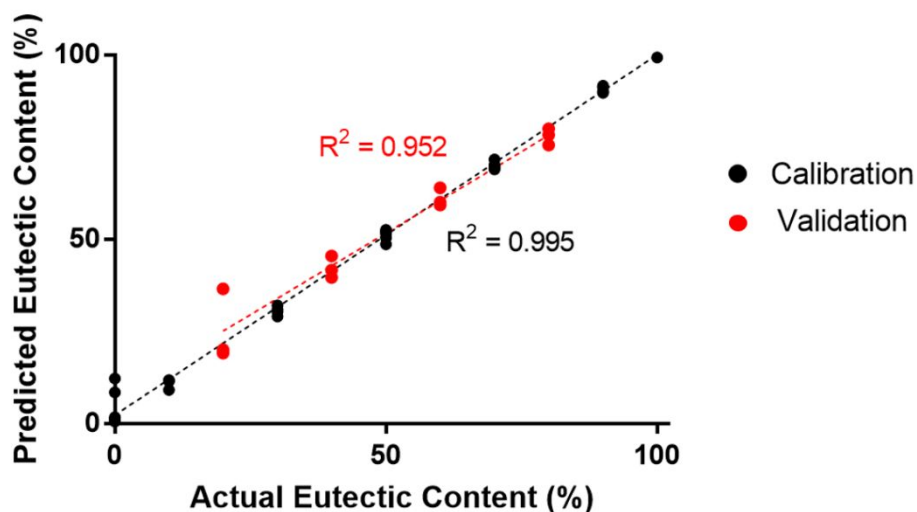

Supplementary Figure 7 Graph of observed versus predicted eutectic content (%).

Supplementary Table 2 Drug percentage (DP %) and dissolution rate (DR %/min) at particular timepoints for the EPO extrudates of ABZ and ABZ-MA 1:2.

|                    | DP (%)  |          |          | DR (%/min) |          |                          |
|--------------------|---------|----------|----------|------------|----------|--------------------------|
|                    | 5 min   | 30 min   | 120 min  | 5 min      | 30 min   | 120 min                  |
| ABZ-EPO            | 7.1±1.2 | 17.7±0.5 | 38.8±0.9 | 1.4±0.2    | 0.6±0.1  | 0.3±7.3x10 <sup>-3</sup> |
| ABZ-MA-EPO MiniLab | 8.7±0.6 | 22.3±0.7 | 68.9±1.3 | 1.7±0.1    | 0.7±0.02 | 0.6±4.4x10 <sup>-3</sup> |
| ABZ-MA-EPO Rondol  | 7.4±1.6 | 24.8±4.2 | 71.5±1.0 | 1.5±0.3    | 0.8±0.1  | 0.6±8.3x10 <sup>-3</sup> |
